# Supplementary material for: Addiction peer recovery coach training pilot: assessment of confidence levels
Source: PeerJ. 2021 Feb 24;9:e10783. doi: 10.7717/peerj.10783 (PMC7912601; doi:10.7717/peerj.10783)
Supplement: Supplemental Information 1 [file peerj-09-10783-s001.xlsx]

## Sheet: PRC training
	Pre-assessment											Post-assessment
participant number	role	assisting	define	help	boundaries	selfassured	recoveryplan	effective	techniques		participant number	prole	passisting	pdefine	phelp	pboundaries	pselfassured	precoveryplan	peffective	ptechniques
1	7	8	6	9	8	9	7	7	7		1	9	9	9	9	9	9	9	9	9
2	6	7	5	6	7	7	7	7	6		2	9	9	9	9	9	9	9	9	9
3	6	7	2	8	9	7	9	7	7		3	9	9	9	9	9	9	9	9	9
4	7	6	5	5	6	6	6	6	4		4	9	8	9	9	9	8	9	8	9
5	2	9	2	9	9	9	9	9	9		5	9	9	9	9	9	9	9	9	9
6	4	5	2	6	6	6	6	2	3		6	8	8	7	7	8	8	7	8	7
7	9	9	9	9	9	9	9	9	9		7	9	9	9	9	9	9	9	9	9
8	1	9	1	9	6	9	8	5	8		8	9	9	9	9	8	9	8	9	8
9	1	3	1	3	3	4	2	2	1		9	7	9	8	8	7	8	8	9	7
10	9	8	9	9	7	9	9	9	9		10	9	9	9	9	7	8	9	9	8
11	8	7	7	8	8	7	5	6	6		11	8	8	7	7	9	9	8	7	8
12	5	9	7	7	7	7	7	7	7		12	9	9	9	9	9	9	9	9	9
